# Supplementary material
Source: MDPI journal article supplement (https://www.mdpi.com/2073-4344/13/9/1257)

## Supplementary Materials

# A New Family of Vinyl Selenocyanates with the Amide Function Based on the Reaction of Potassium Selenocyanate with 3-Trimethylsilyl-2-propynamides

Mikhail V. Andreev, Vladimir A. Potapov, Maxim V. Musalov, Lyudmila I. Larina\*

A. E. Favorsky Irkutsk Institute of Chemistry, Siberian Division of The Russian Academy of Sciences, 1  
Favorsky Str., Irkutsk 664033, Russian Federation; miand@irioch.irk.ru (M.V.A.); v.a.potapov@mail.ru (V.A.P.);  
musalov\_maxim@irioch.irk.ru (M.V.M.)

\* Correspondence: larina@irioch.irk.ru

## Table of Contents

|                                                                                                            |             |
|------------------------------------------------------------------------------------------------------------|-------------|
| <b>General Information</b>                                                                                 | <b>2</b>    |
| <b><math>^1\text{H}</math> and <math>^{13}\text{C}</math>-NMR Spectra of Silyl-2-propynamides 1c, 1i-k</b> | <b>3-6</b>  |
| <b><math>^1\text{H}</math> and <math>^{13}\text{C}</math>-NMR Spectra of Selenocyanates 2a-l</b>           | <b>7-18</b> |

## General Information

The  $^1\text{H}$  (400.1 MHz),  $^{13}\text{C}$  (100.6 MHz),  $^{77}\text{Se}$  (76.3 MHz),  $^{29}\text{Si}$  (79.5 MHz) NMR and  $^{15}\text{N}$  (40.6 MHz) NMR spectra (the spectra can be found in Supplementary Materials) were recorded on a Bruker DPX-400 spectrometer (Bruker BioSpin GmbH, Rheinstetten, Germany) in  $\text{CDCl}_3$  or  $\text{DMSO}-d_6$  solutions and referred to the residual solvent peaks ( $\text{CDCl}_3$ ,  $\delta = 7.27$  and  $77.1$  ppm;  $\text{DMSO}-d_6$ ,  $\delta = 2.50$  and  $39.6$  ppm for  $^1\text{H}$ - and  $^{13}\text{C}$ -NMR, respectively), tetramethylsilane ( $^{29}\text{Si}$ ), nitromethane ( $^{15}\text{N}$ ) and dimethyl selenide ( $^{77}\text{Se}$ ).

# <sup>1</sup>H and <sup>13</sup>C NMR Spectra of 3-trimethylsilyl-2-propynamides **1c**, **1i-k**

<sup>1</sup>H-NMR (400 MHz, CDCl<sub>3</sub>, 298K) of the compound **1c**

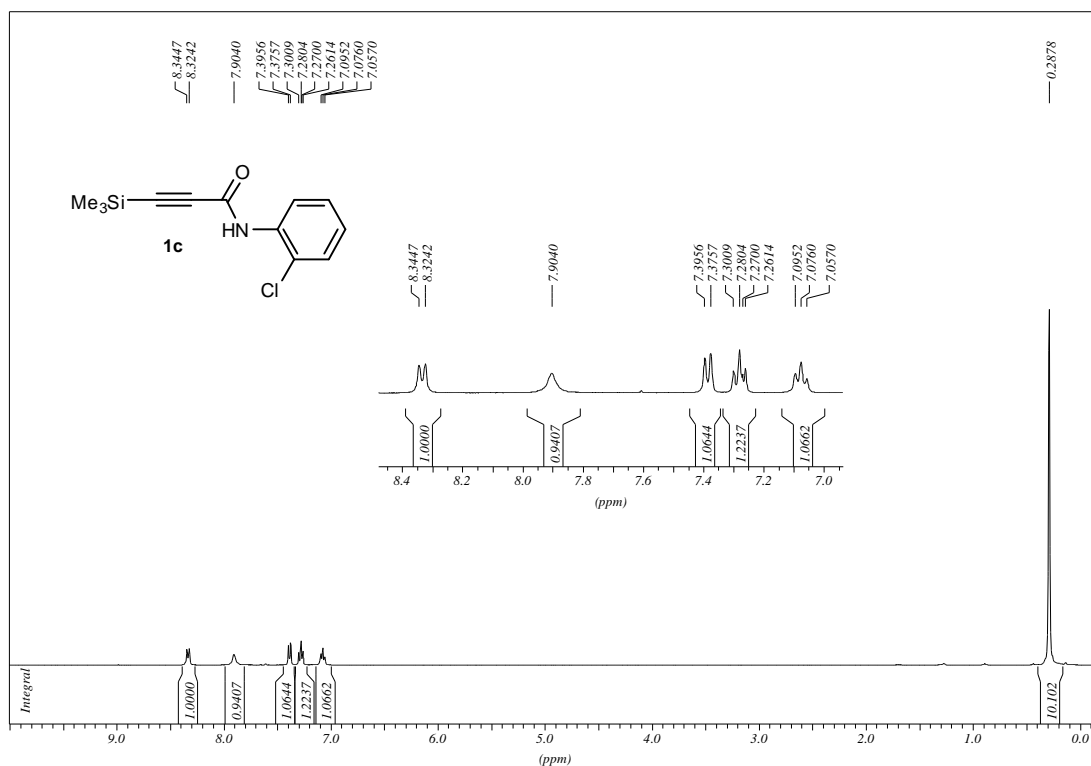

<sup>13</sup>C-NMR (100 MHz, CDCl<sub>3</sub>, 298K) of the compound **1c**

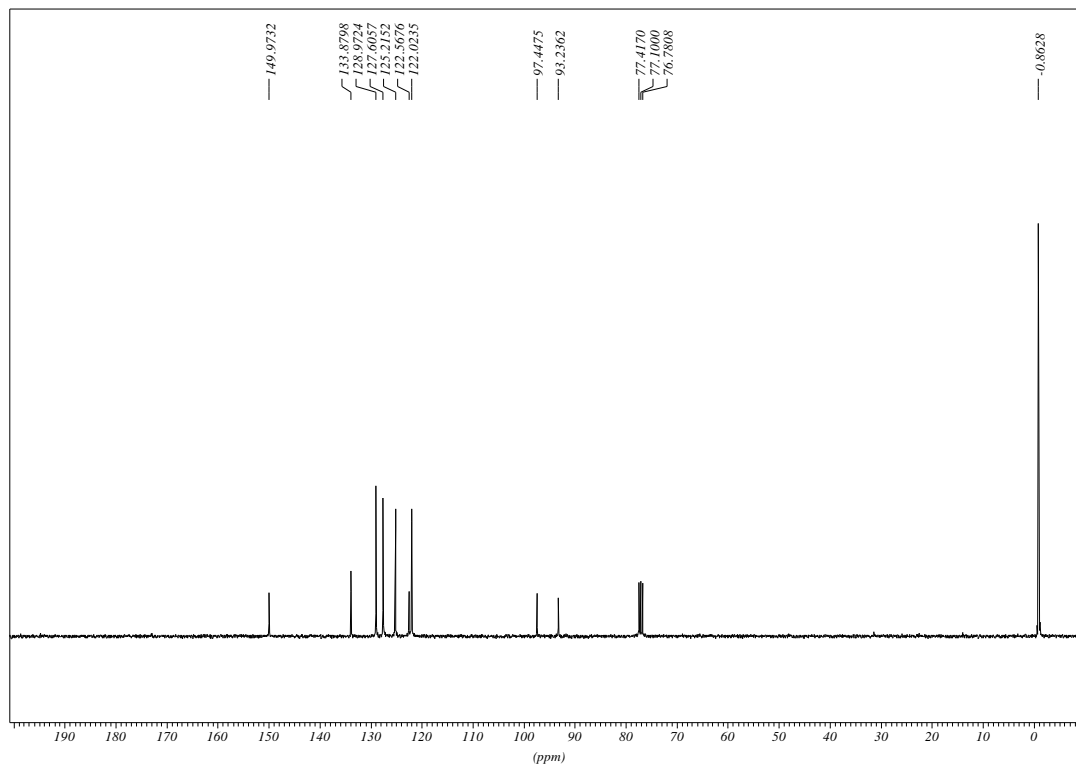

$^1\text{H}$ -NMR (400 MHz,  $\text{CDCl}_3$ , 298K) of the compound **1i** (a mixture of rotamers)

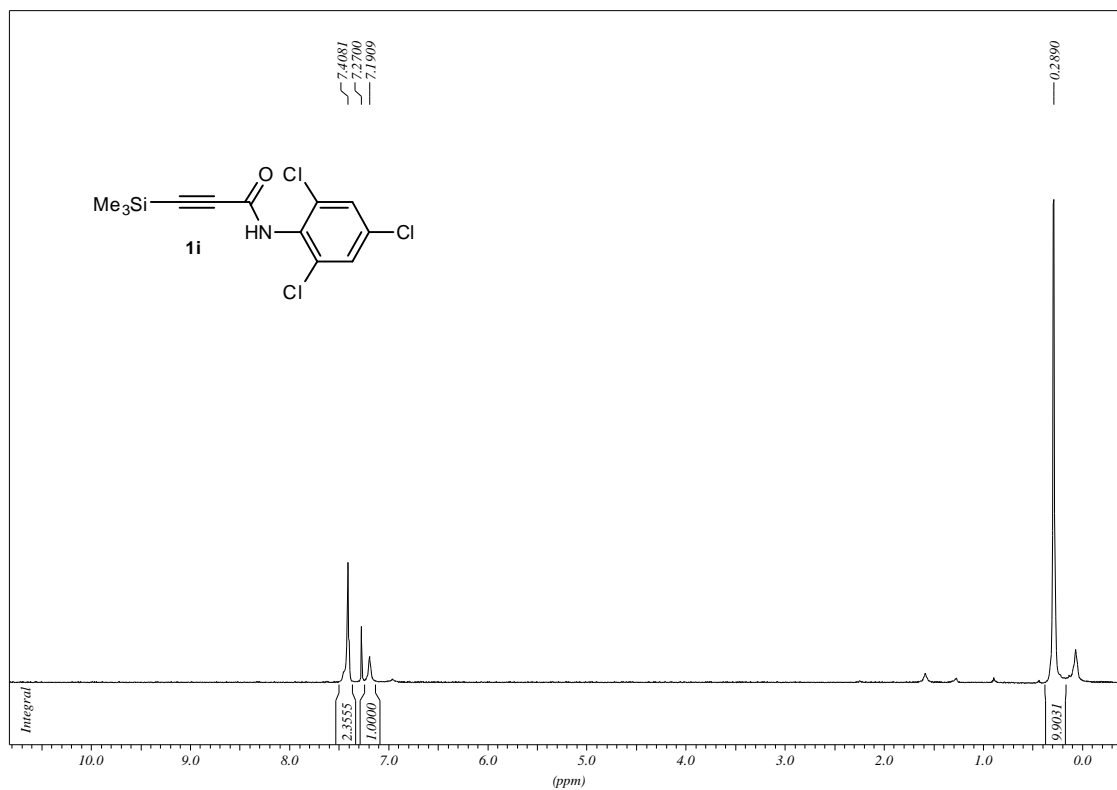

$^{13}\text{C}$ -NMR (100 MHz,  $\text{CDCl}_3$ , 298K) of the compound **1i** (a mixture of rotamers)

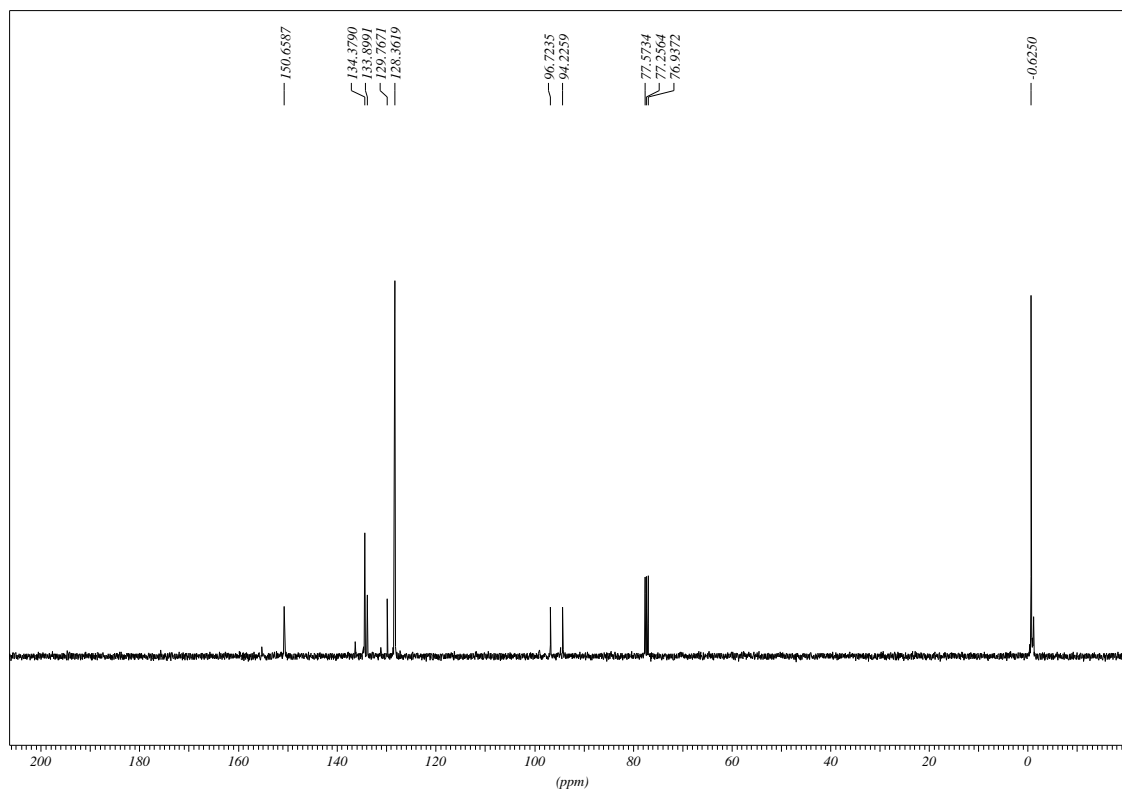

$^1\text{H}$ -NMR (400 MHz,  $\text{CDCl}_3$ , 298K) of the compound **1j** (a mixture of rotamers)

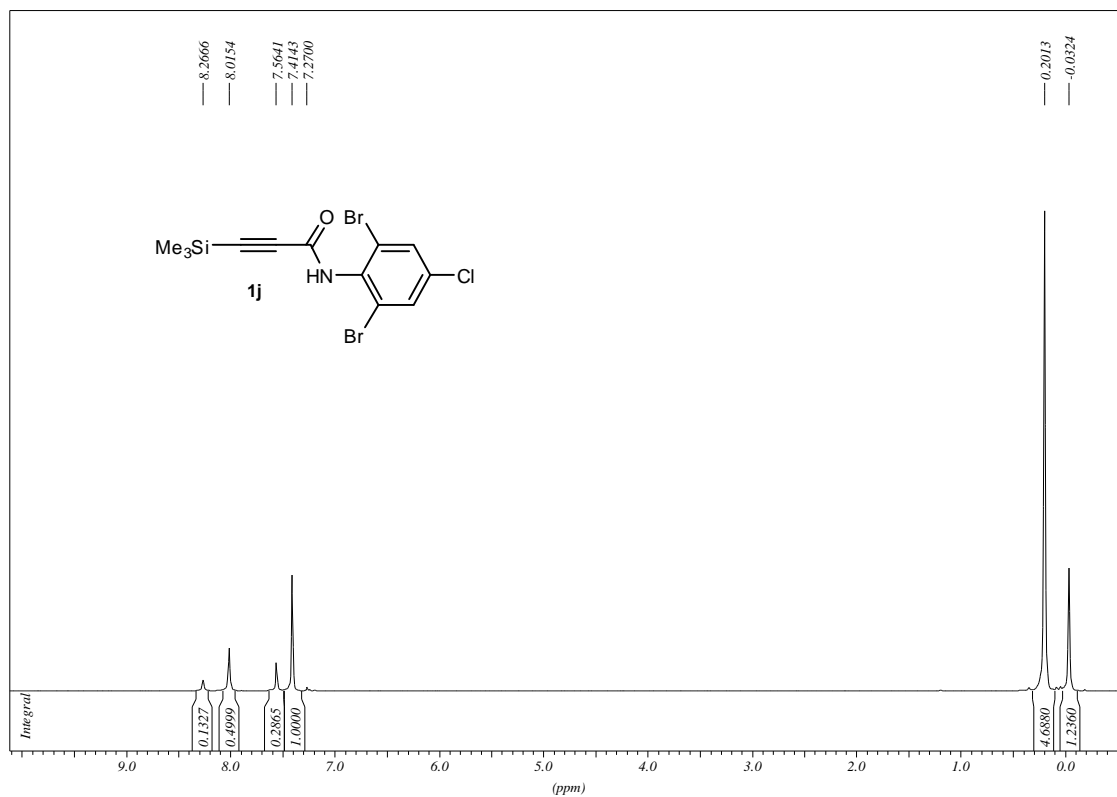

$^{13}\text{C}$ -NMR (100 MHz,  $\text{CDCl}_3$ , 298K) of the compound **1j** (a mixture of rotamers)

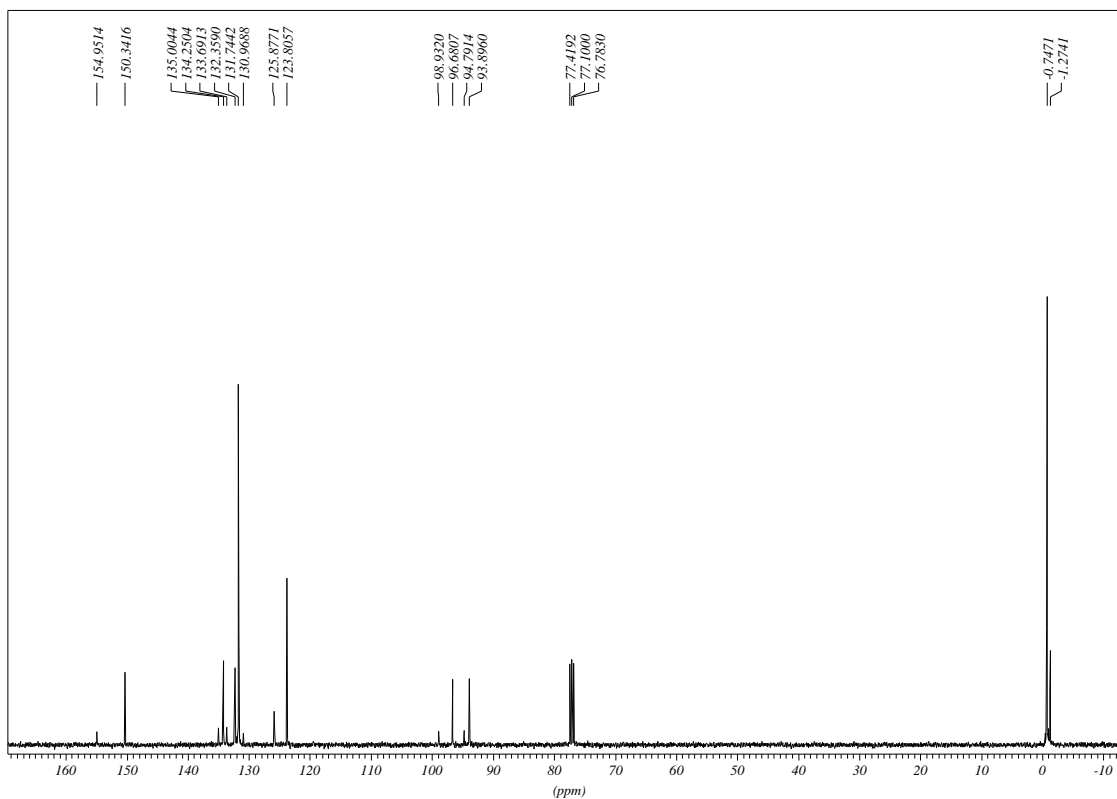

$^1\text{H-NMR}$  (400 MHz,  $\text{CDCl}_3$ , 298K) of the compound **1k**

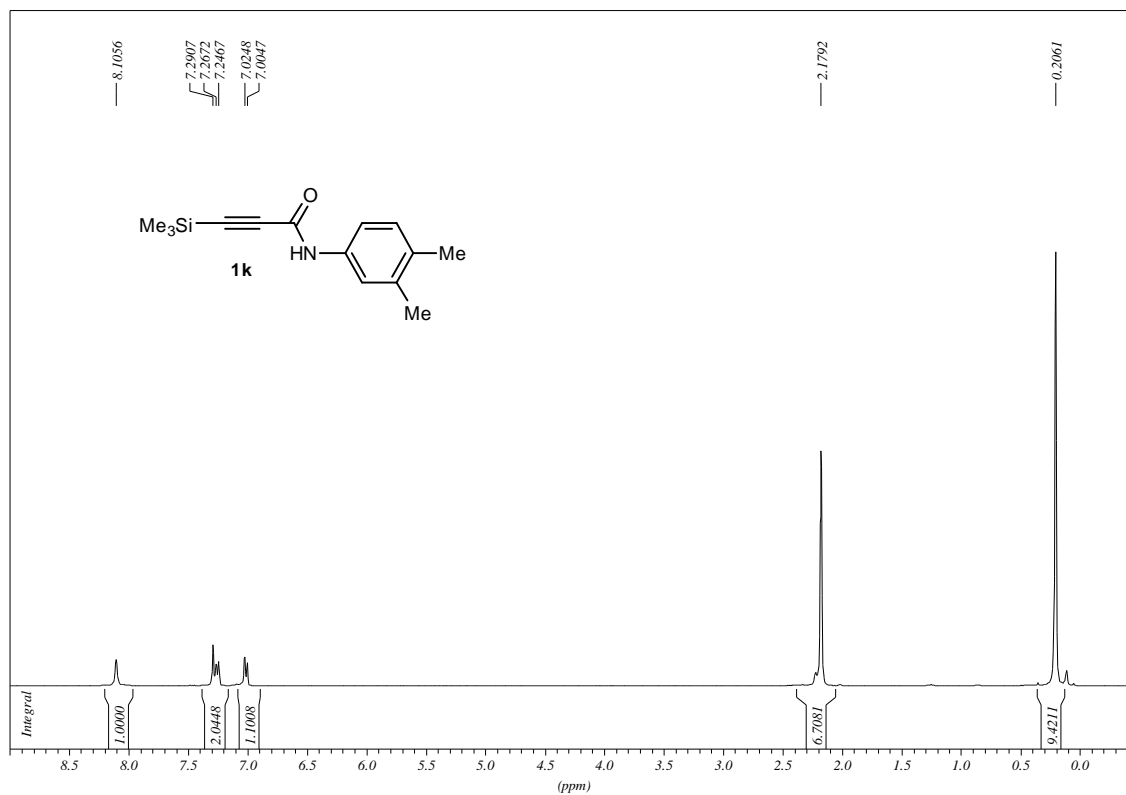

$^{13}\text{C-NMR}$  (100 MHz,  $\text{CDCl}_3$ , 298K) of the compound **1k**

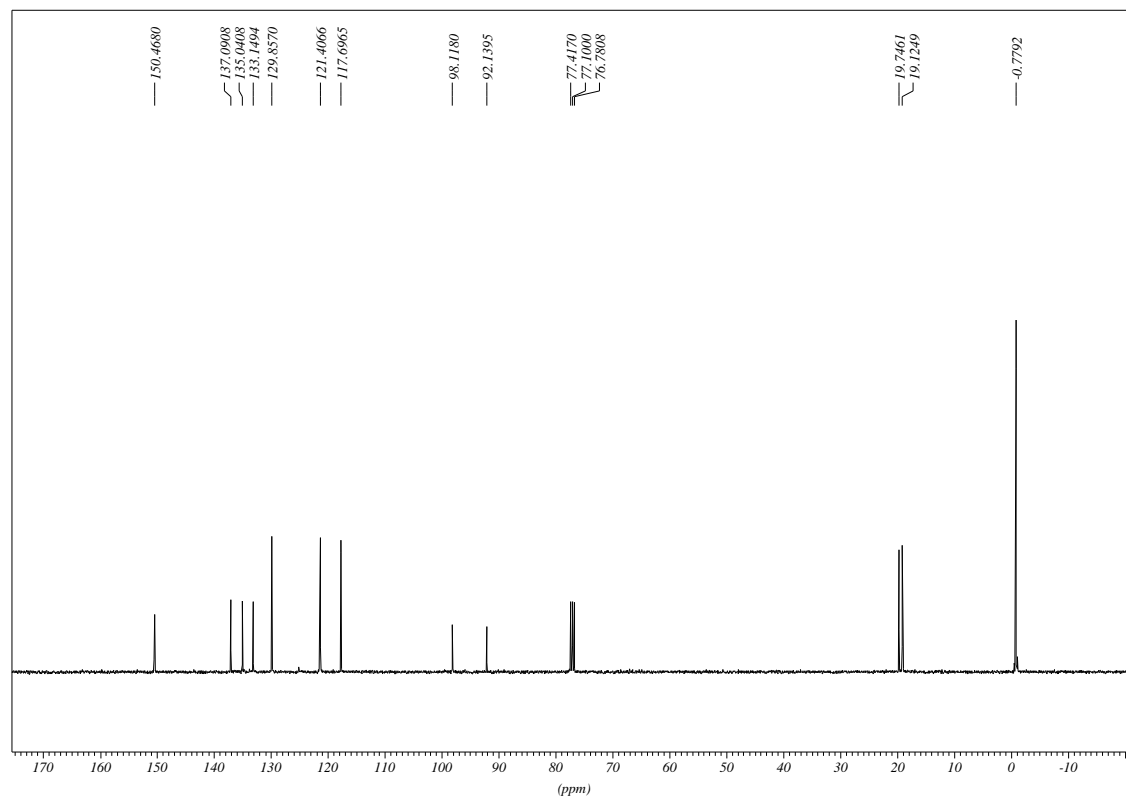

## $^1\text{H}$ and $^{13}\text{C}$ NMR Spectra of Selenocyanates 2a-l

$^1\text{H}$ -NMR (400 MHz,  $\text{DMSO}-d_6$ , 298K) of the compound **2a**

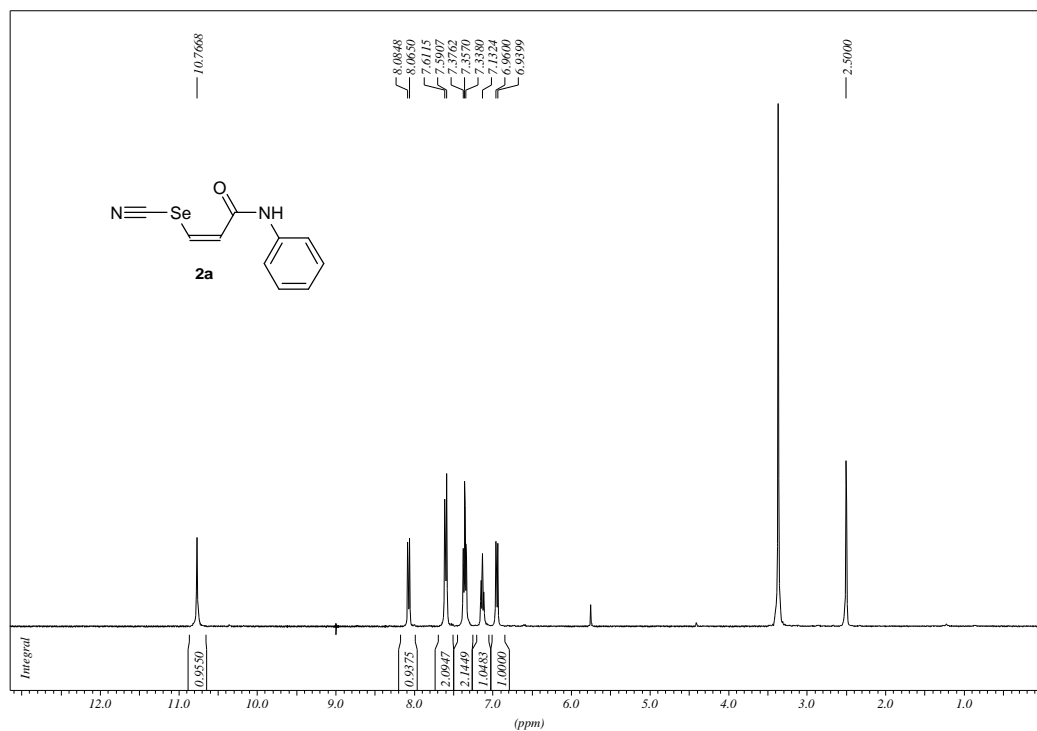

$^{13}\text{C}$ -NMR (100 MHz,  $\text{DMSO}-d_6$ , 298K) of the compound **2a**

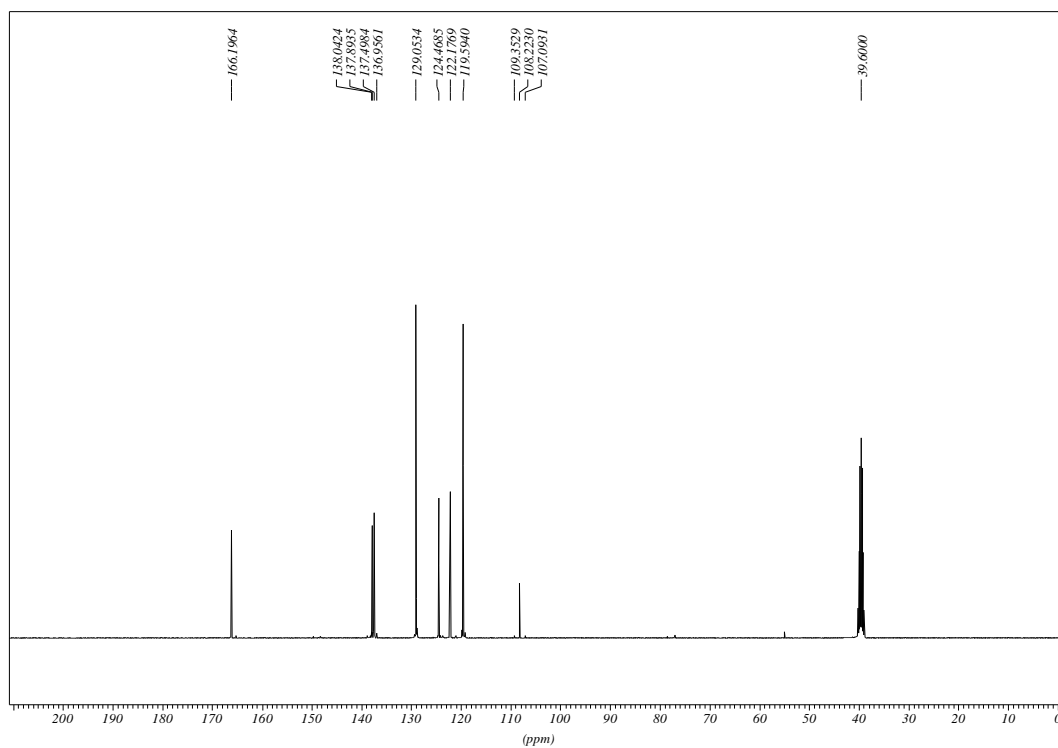

$^1\text{H-NMR}$  (400 MHz,  $\text{DMSO-}d_6$ , 298K) of the compound **2b**

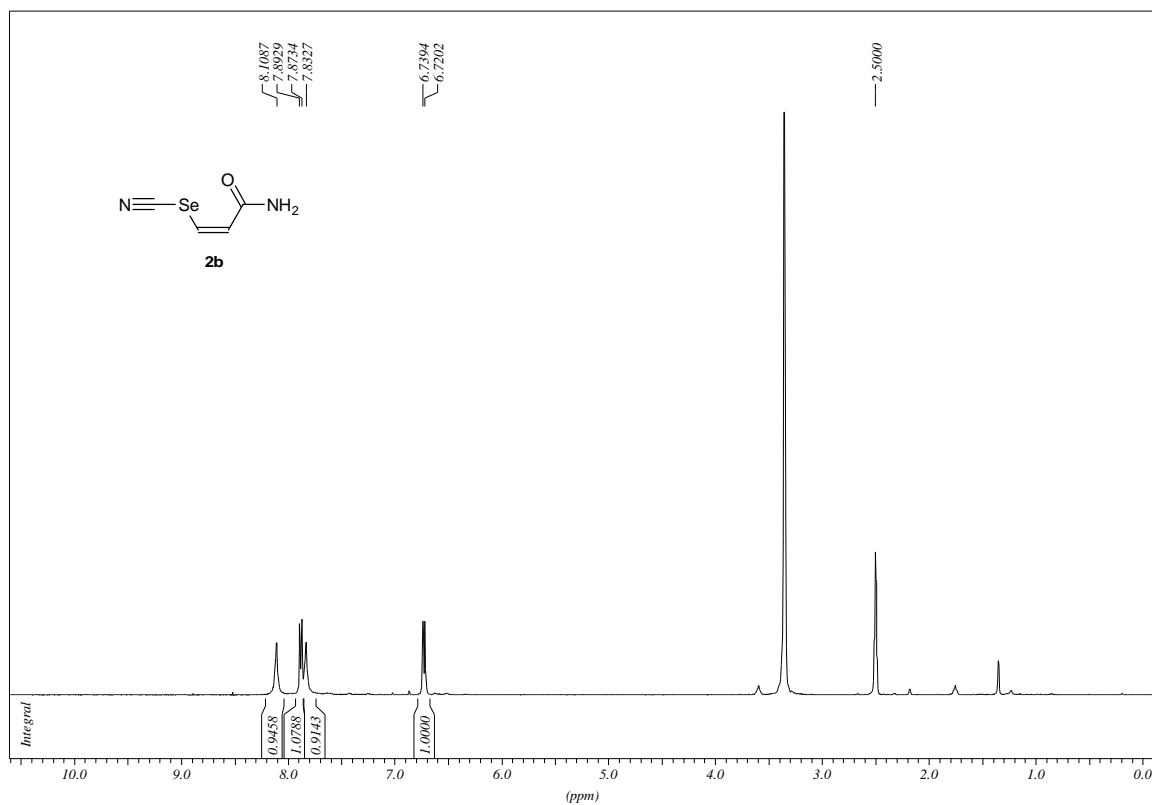

$^{13}\text{C-NMR}$  (100 MHz,  $\text{DMSO-}d_6$ , 298K) of the compound **2b**

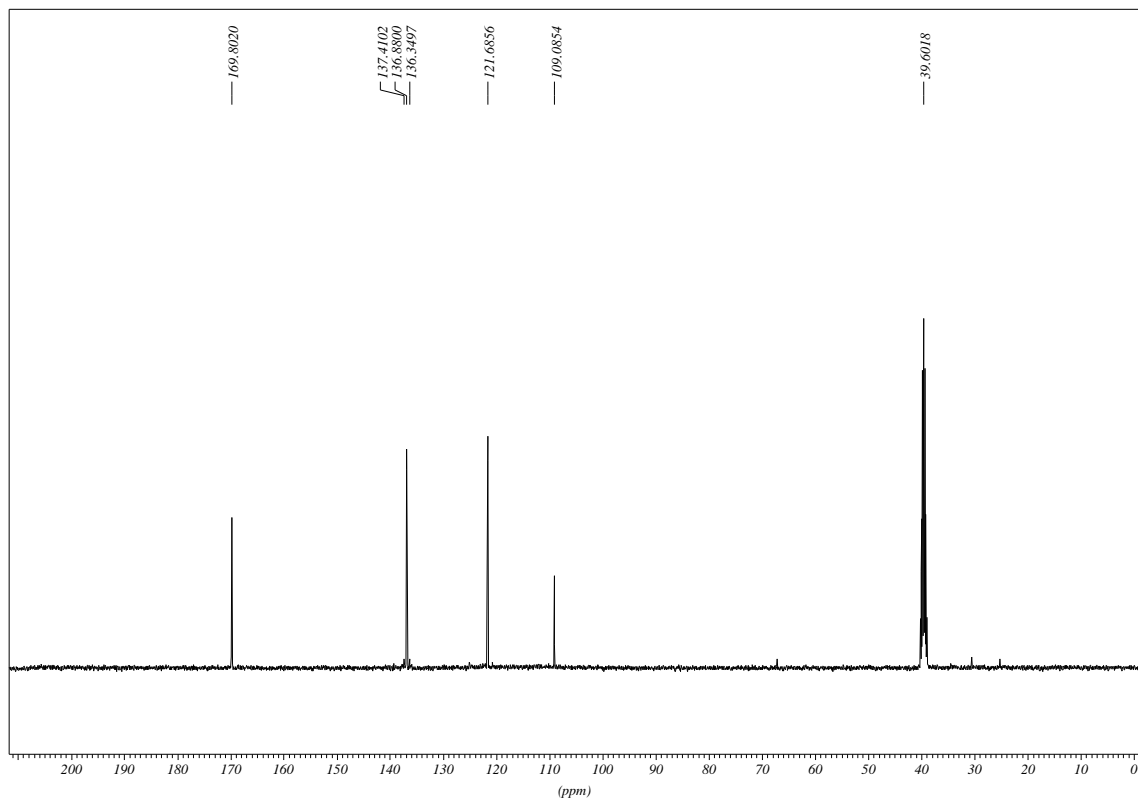



$^1\text{H-NMR}$  (400 MHz,  $\text{DMSO-}d_6$ , 298K) of the compound **2c**

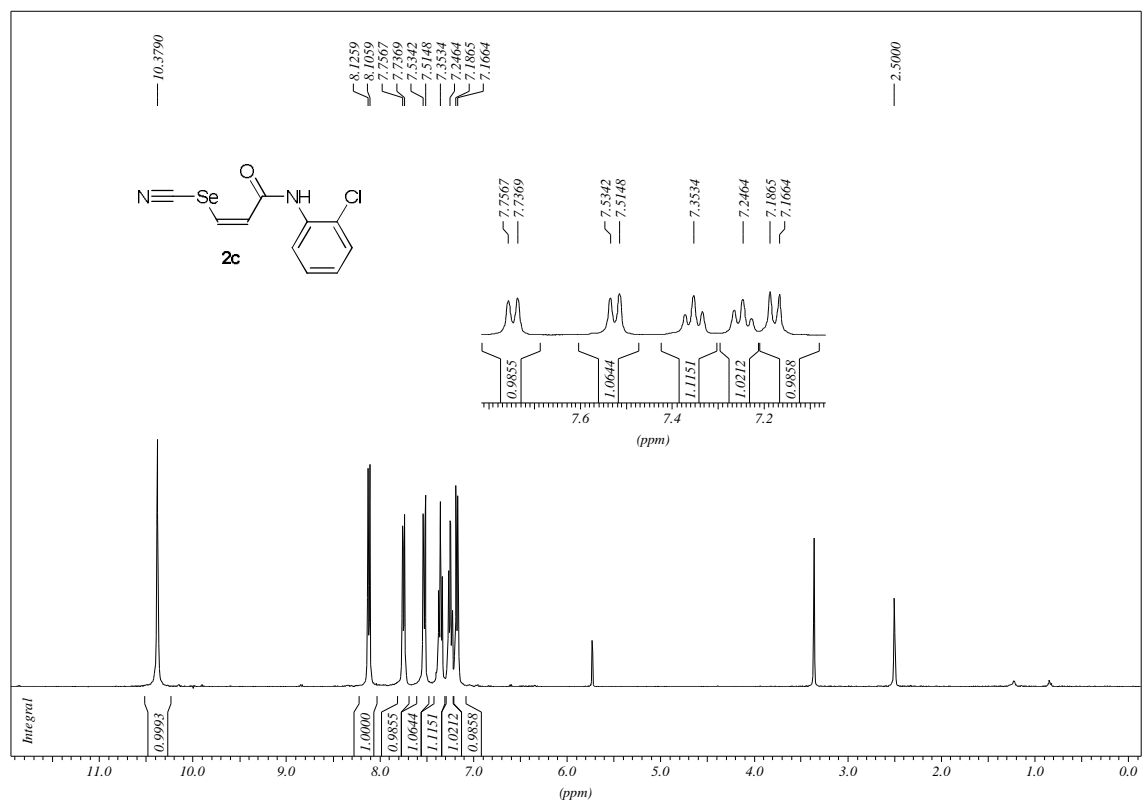

$^{13}\text{C-NMR}$  (100 MHz,  $\text{DMSO-}d_6$ , 298K) of the compound **2c**

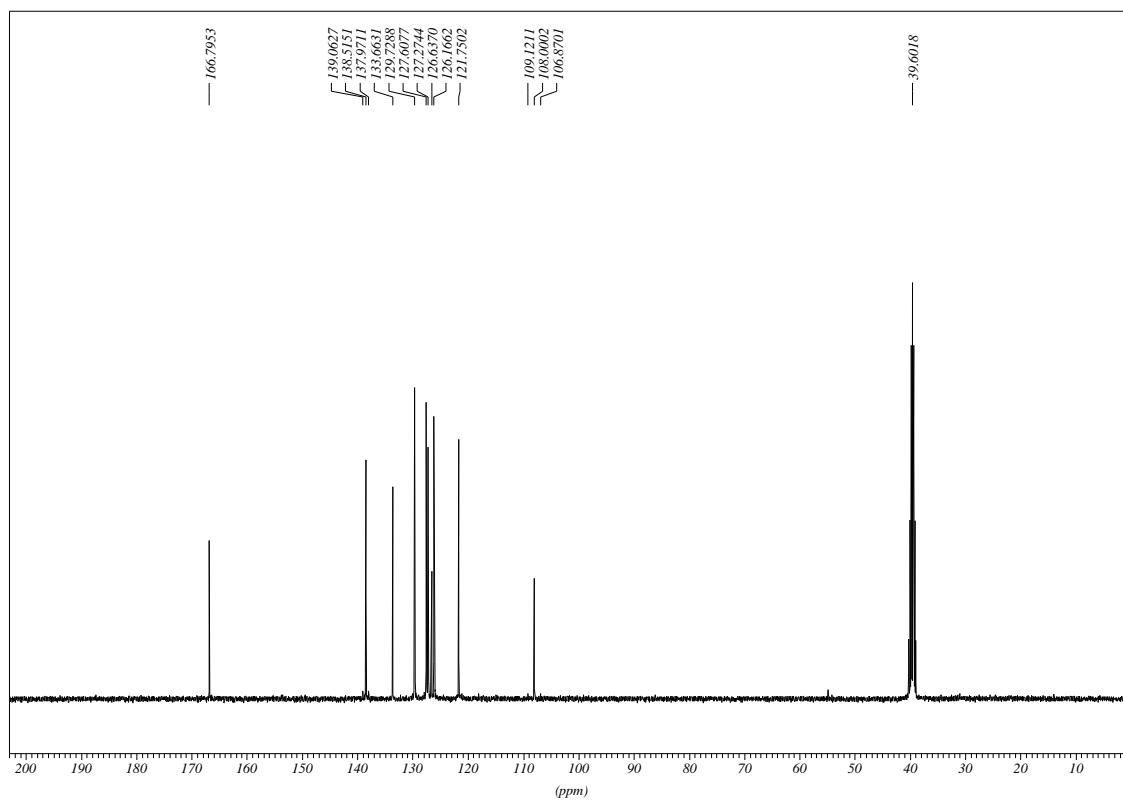

$^1\text{H}$ -NMR (400 MHz,  $\text{DMSO}-d_6$ , 298K) of the compound **2d**

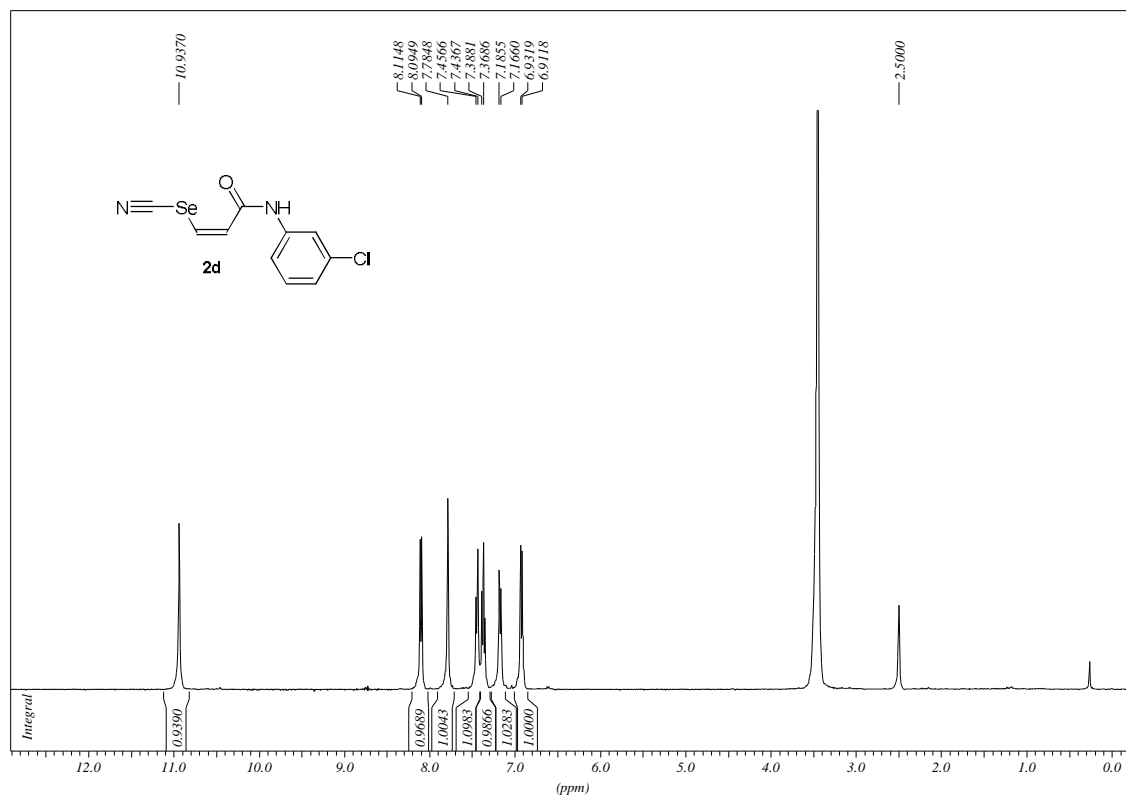

$^{13}\text{C}$ -NMR (100 MHz,  $\text{DMSO}-d_6$ , 298K) of the compound **2d**

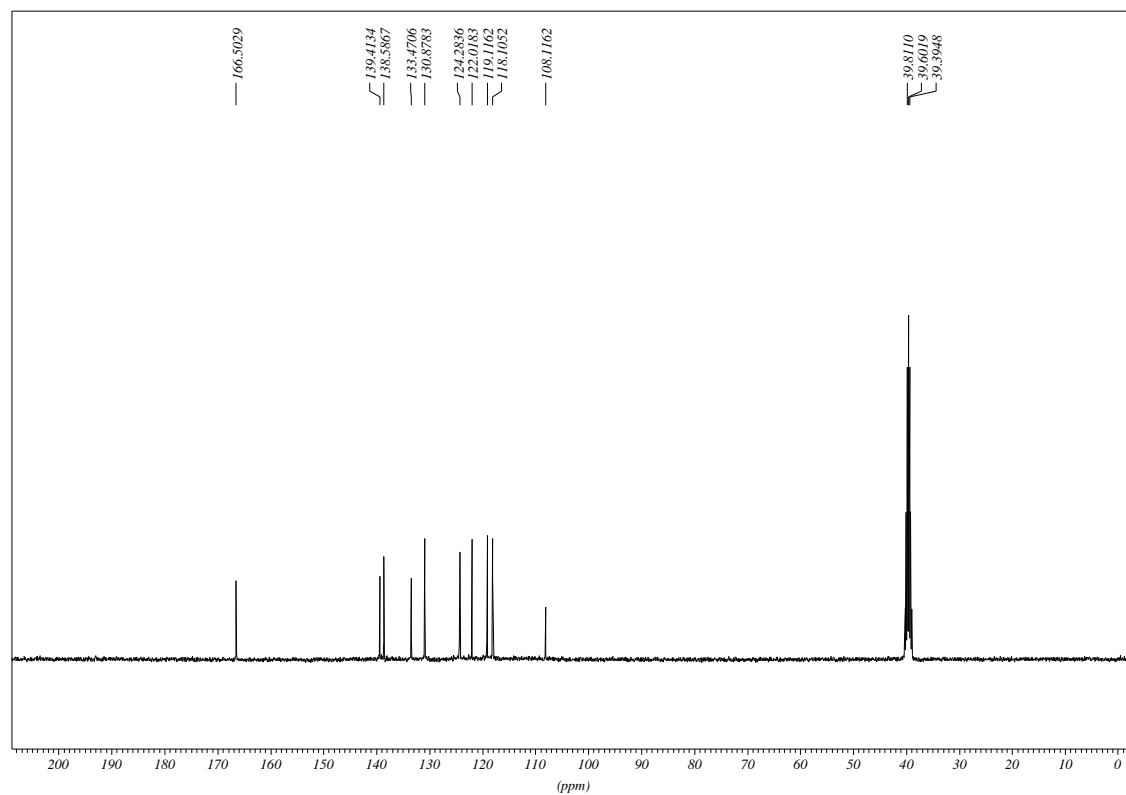

$^1\text{H-NMR}$  (400 MHz,  $\text{DMSO-}d_6$ , 298K) of the compound **2e**

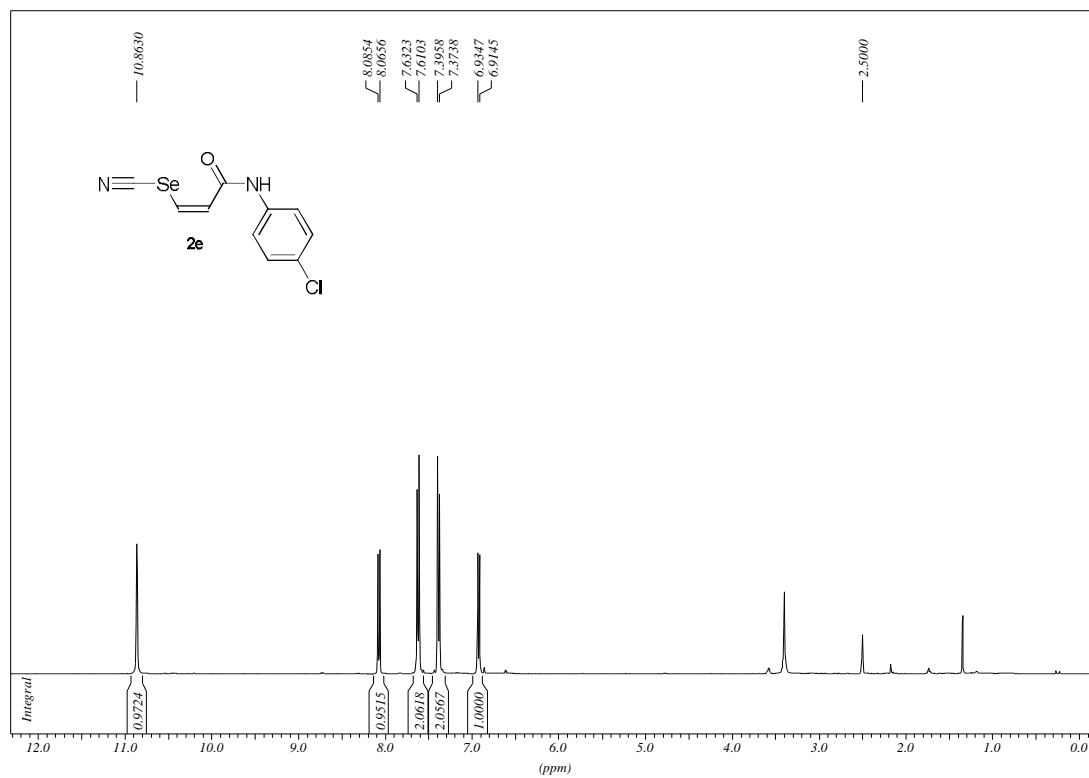

$^{13}\text{C-NMR}$  (100 MHz,  $\text{DMSO-}d_6$ , 298K) of the compound **2e**

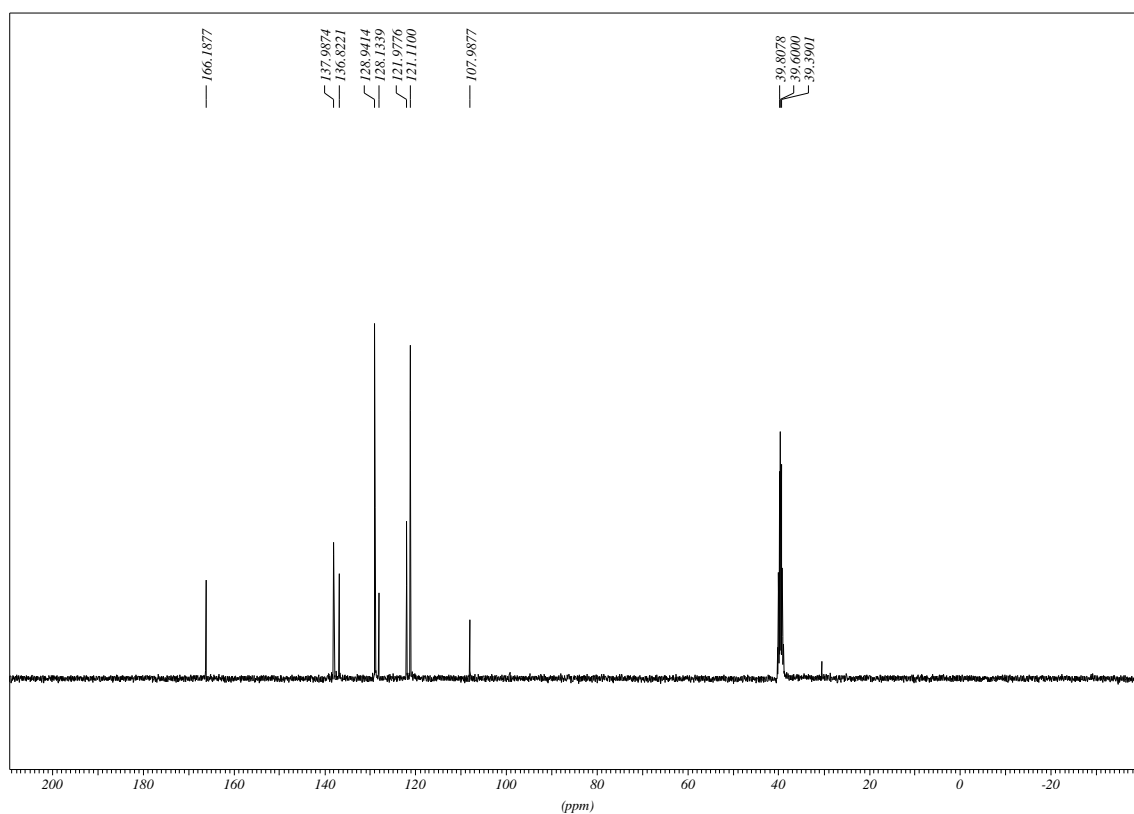

$^1\text{H-NMR}$  (400 MHz,  $\text{DMSO-}d_6$ , 298K) of the compound **2f**

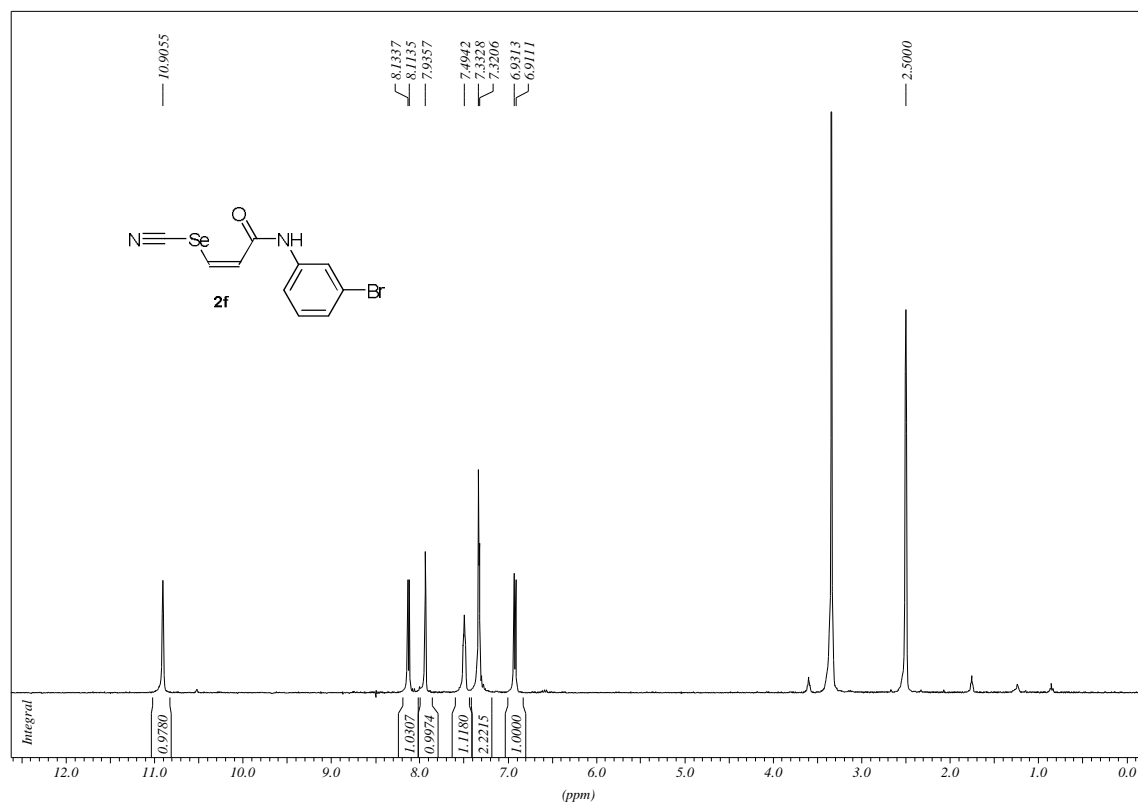

$^{13}\text{C-NMR}$  (100 MHz,  $\text{DMSO-}d_6$ , 298K) of the compound **2f**

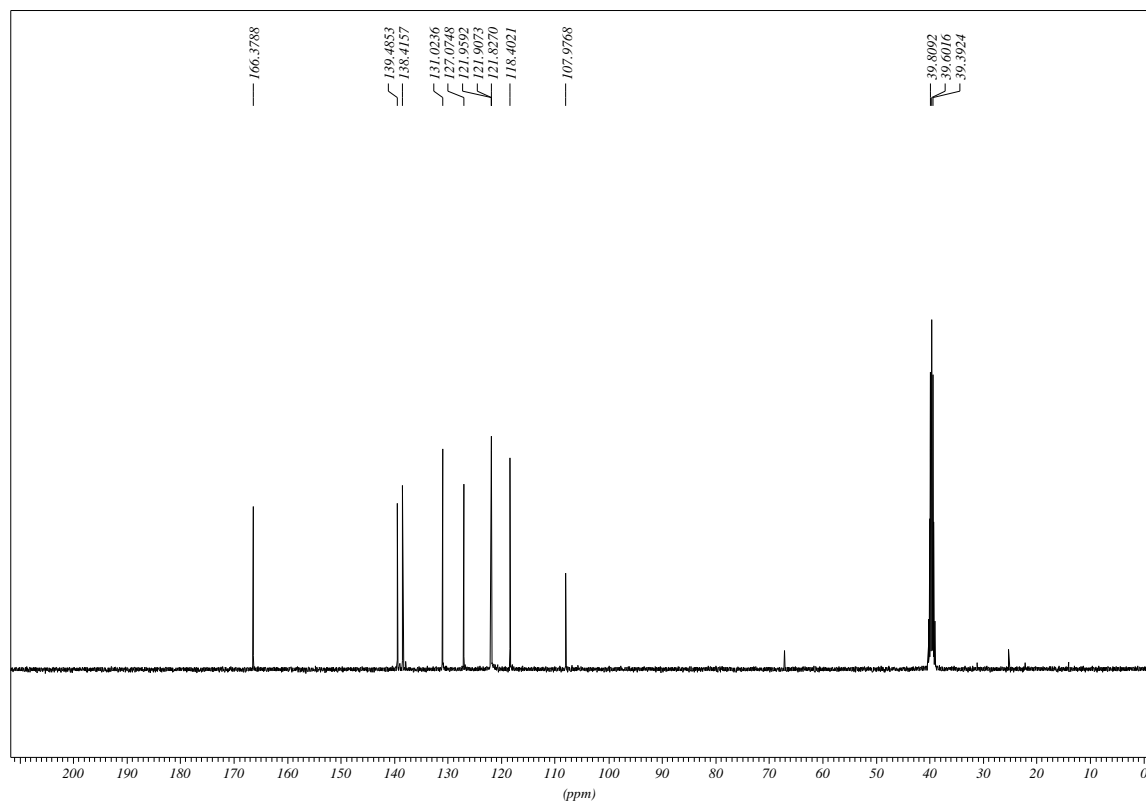

$^1\text{H-NMR}$  (400 MHz,  $\text{DMSO-}d_6$ , 298K) of the compound **2g**

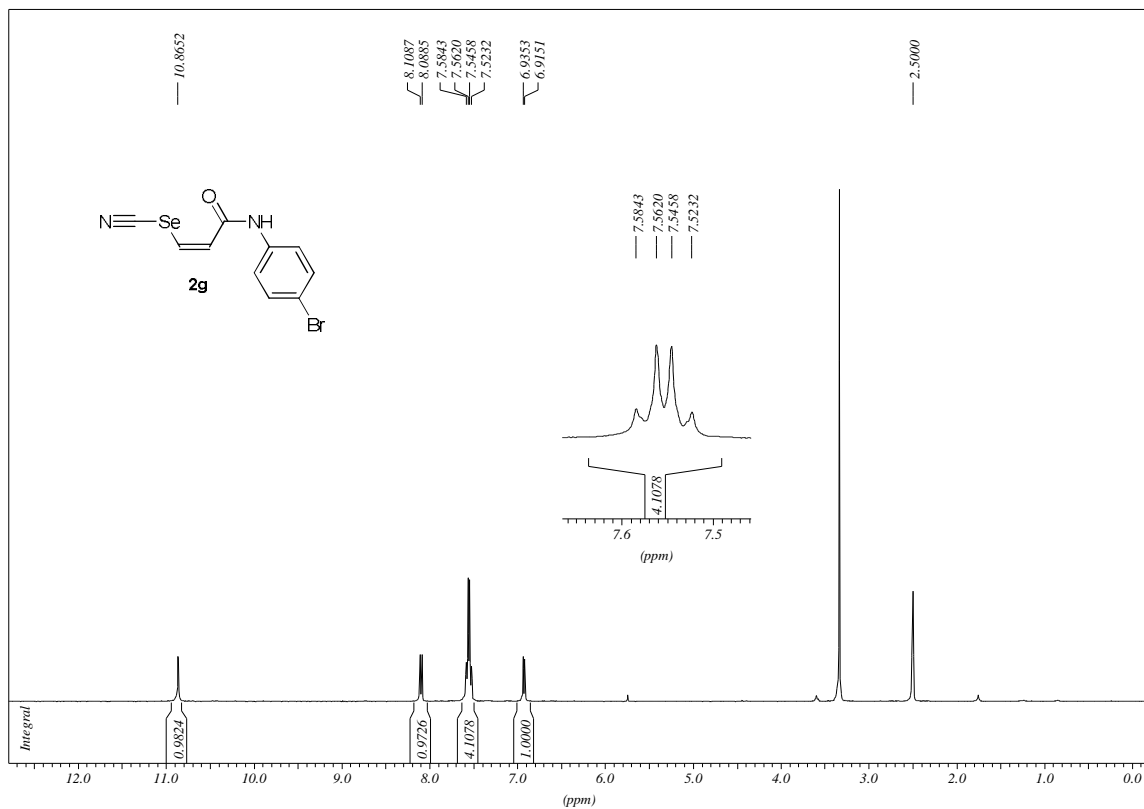

$^{13}\text{C-NMR}$  (100 MHz,  $\text{DMSO-}d_6$ , 298K) of the compound **2g**

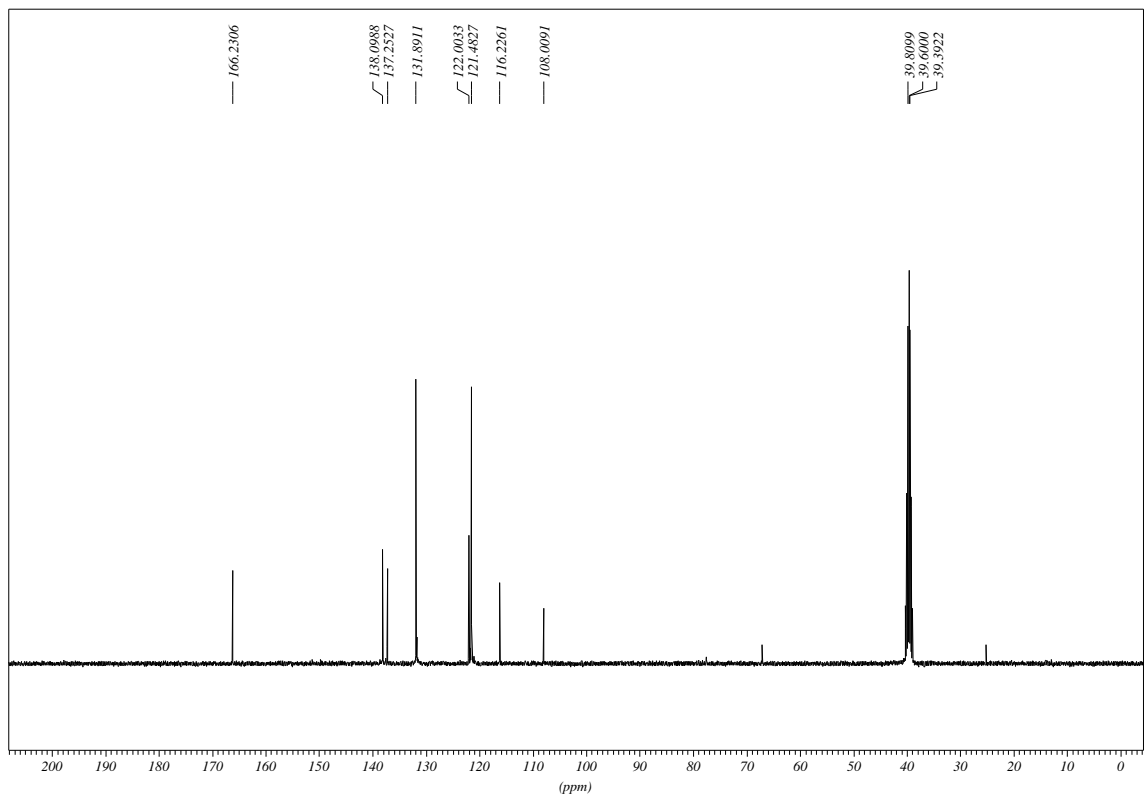

$^1\text{H-NMR}$  (400 MHz,  $\text{DMSO-}d_6$ , 298K) of the compound **2h**

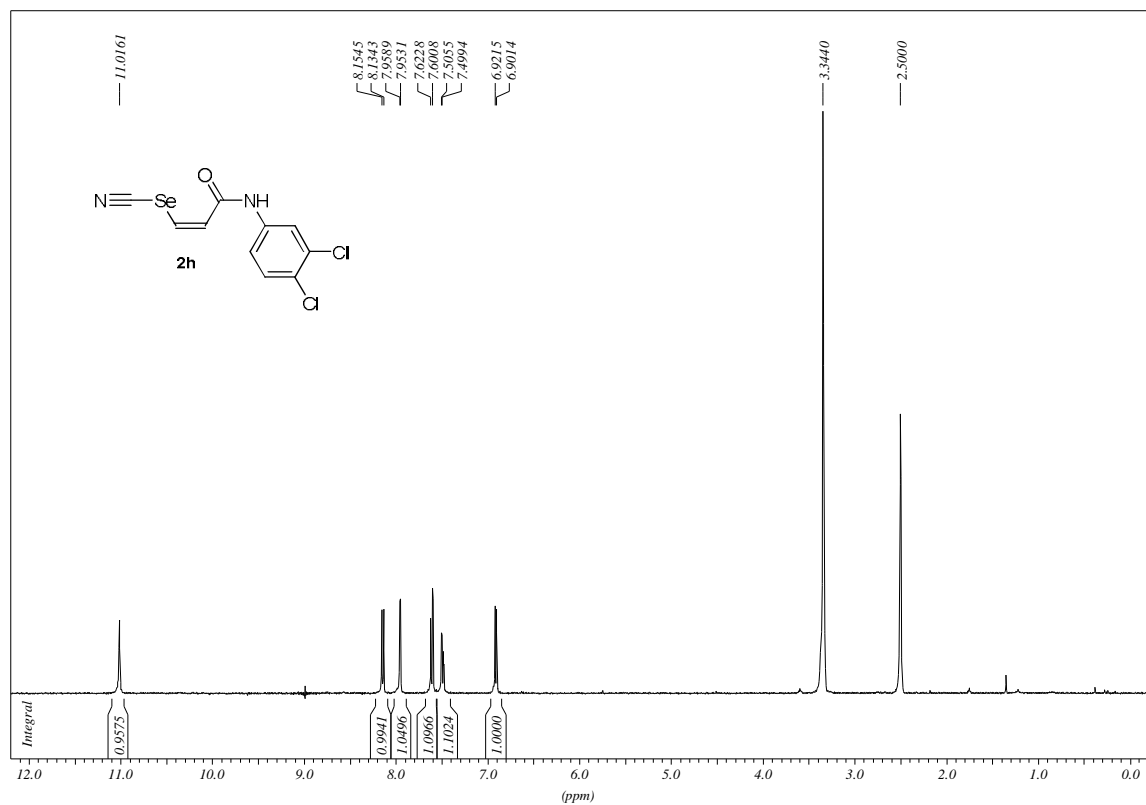

$^{13}\text{C-NMR}$  (100 MHz,  $\text{DMSO-}d_6$ , 298K) of the compound **2c**

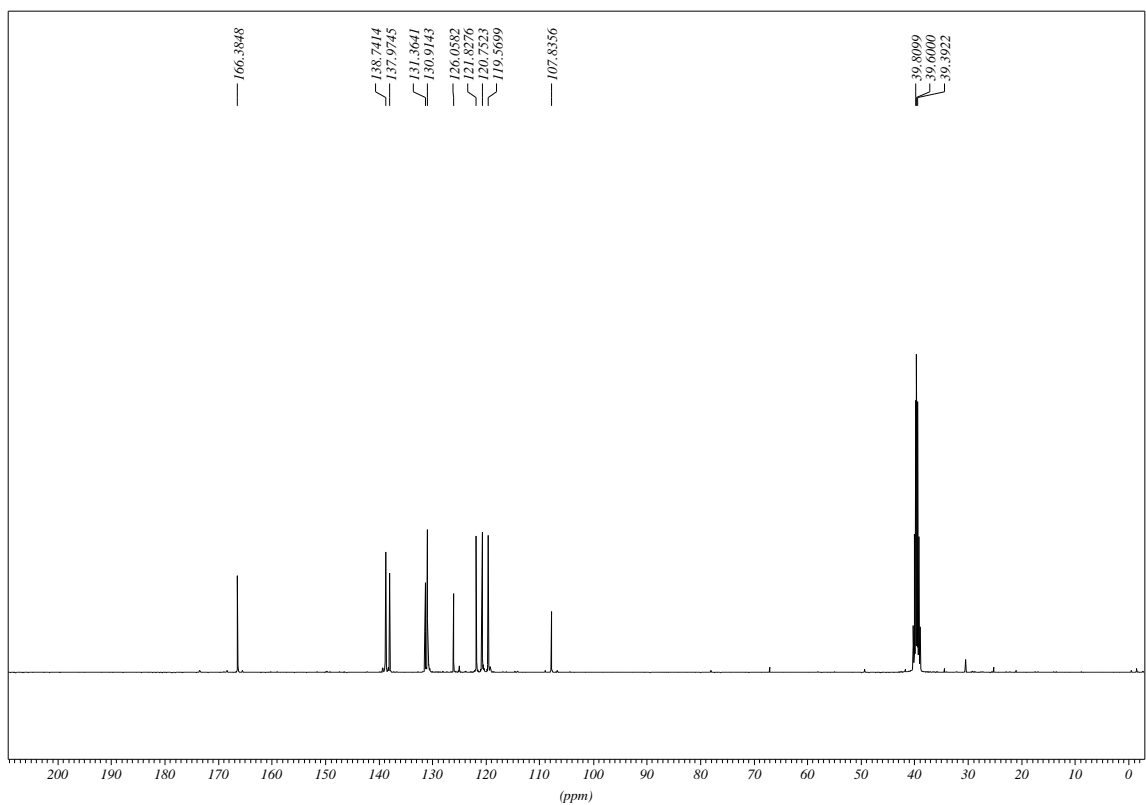

$^1\text{H-NMR}$  (400 MHz,  $\text{DMSO-}d_6$ , 298K) of the compound **2i**

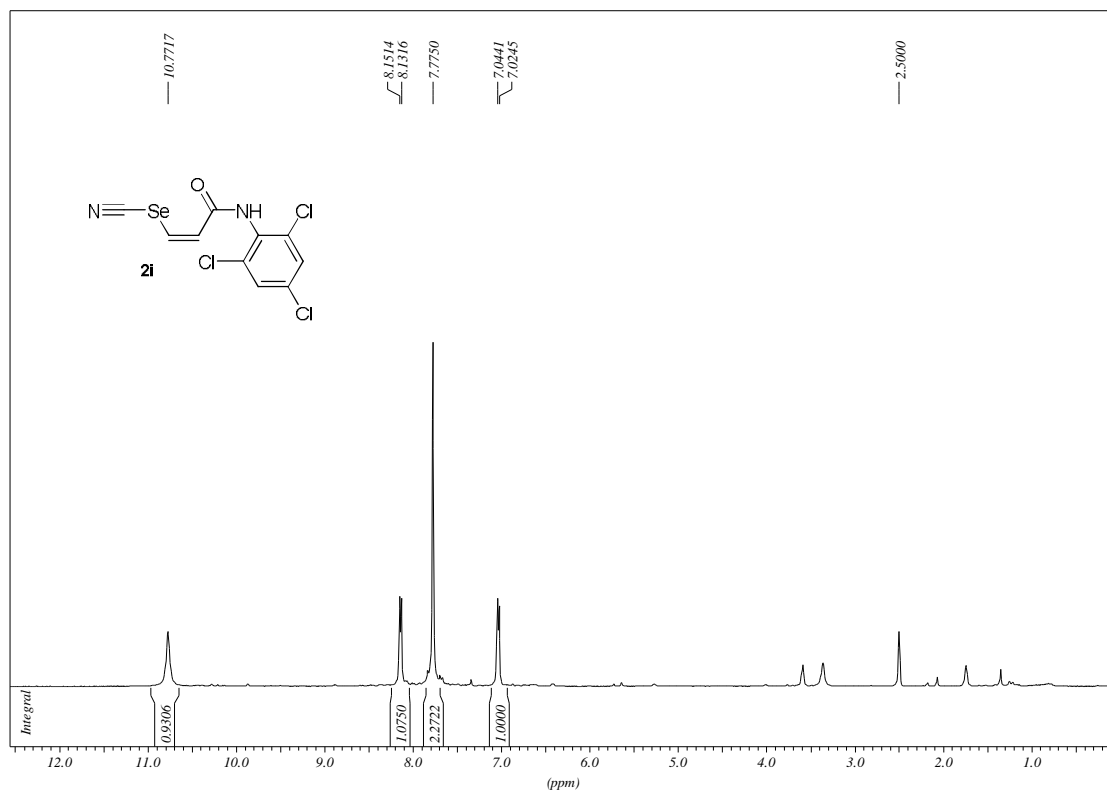

$^{13}\text{C-NMR}$  (100 MHz,  $\text{DMSO-}d_6$ , 298K) of the compound **2i**

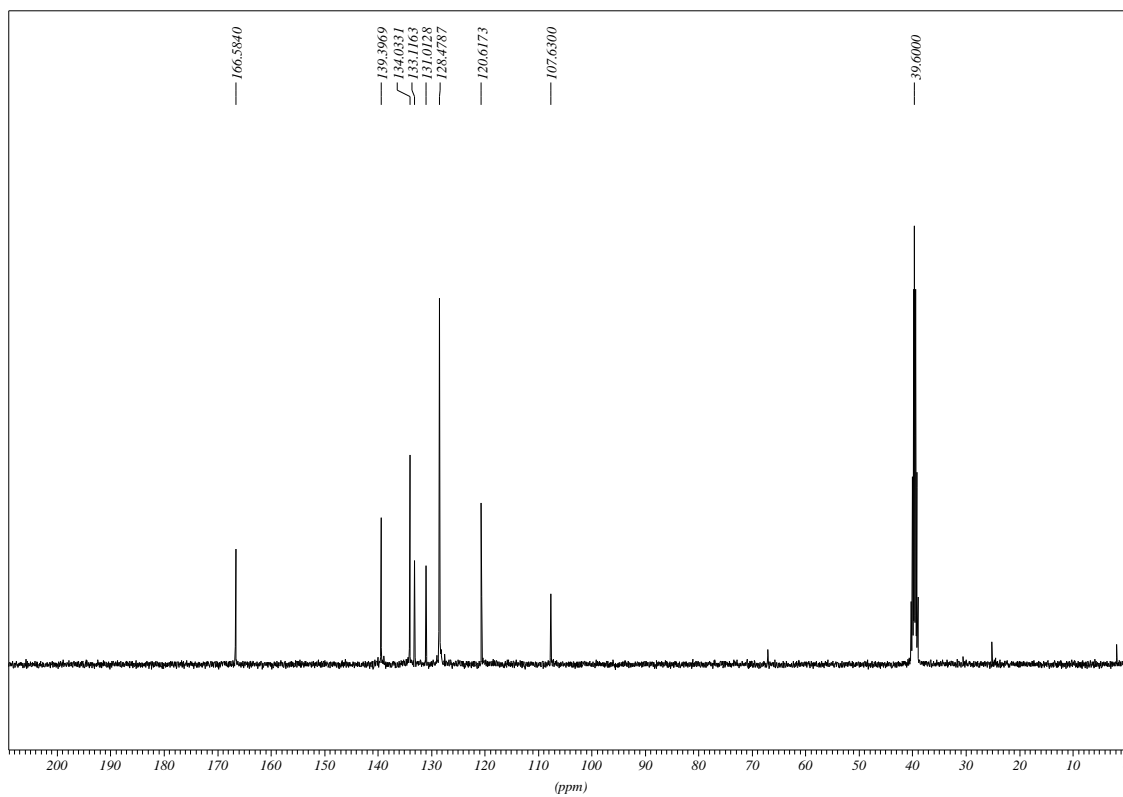

$^1\text{H-NMR}$  (400 MHz,  $\text{DMSO-}d_6$ , 298K) of the compound **2j**

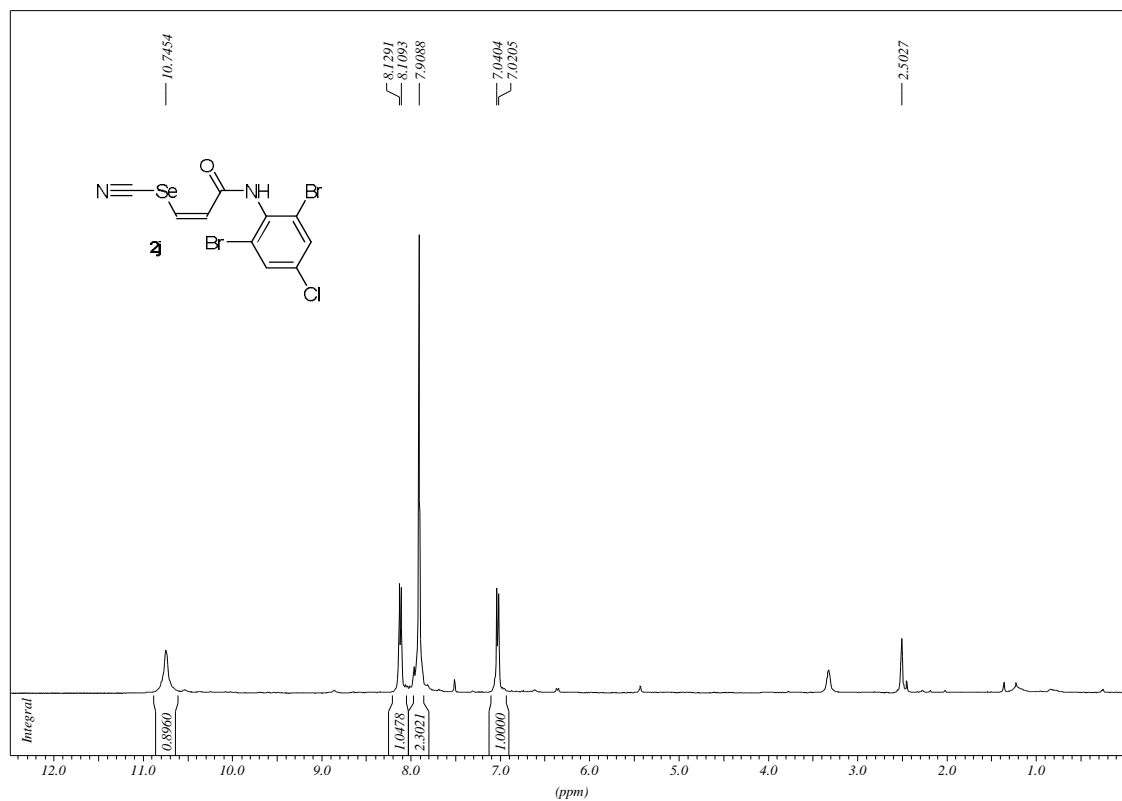

$^{13}\text{C-NMR}$  (100 MHz,  $\text{DMSO-}d_6$ , 298K) of the compound **2j**

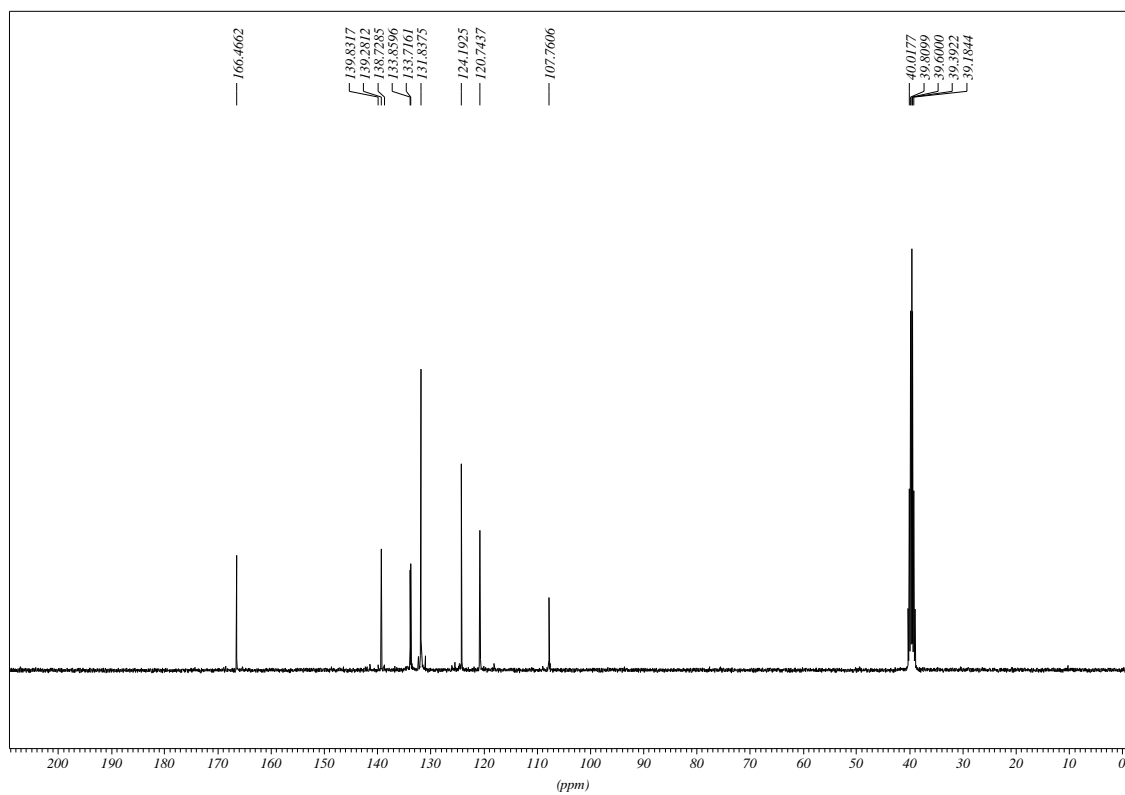



$^1\text{H-NMR}$  (400 MHz,  $\text{DMSO-}d_6$ , 298K) of the compound **2k**

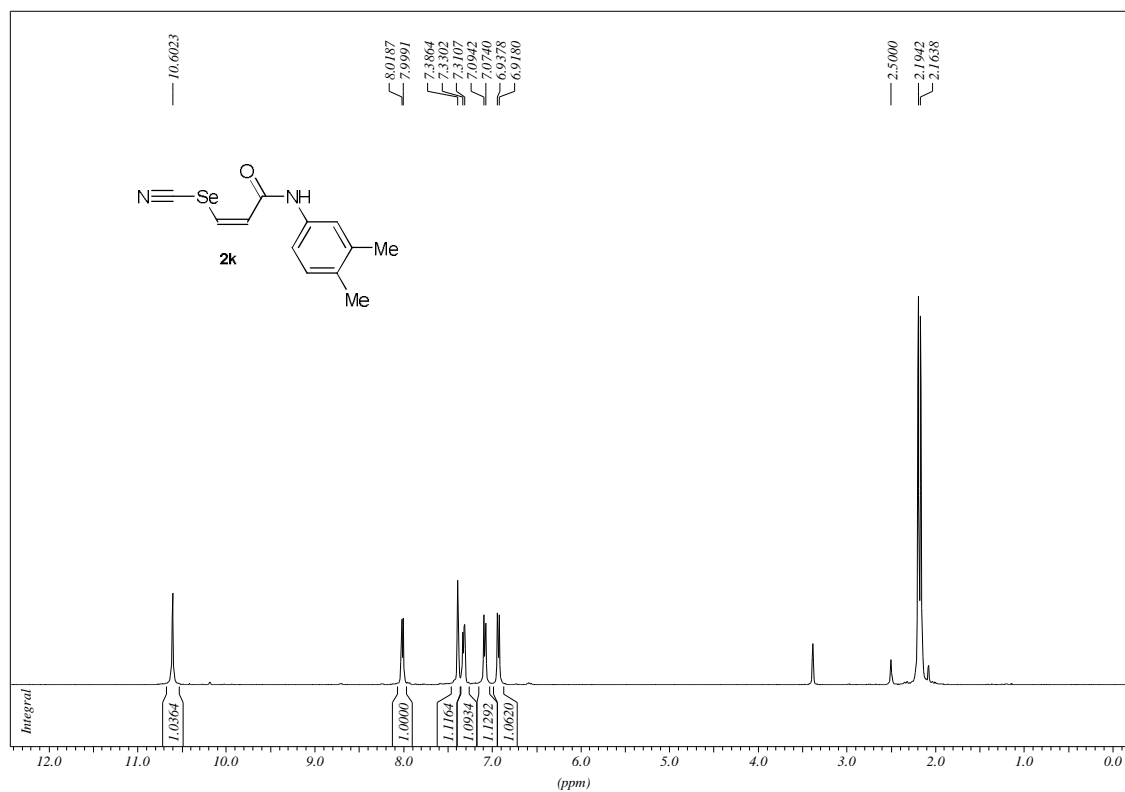

$^{13}\text{C-NMR}$  (100 MHz,  $\text{DMSO-}d_6$ , 298K) of the compound **2k**

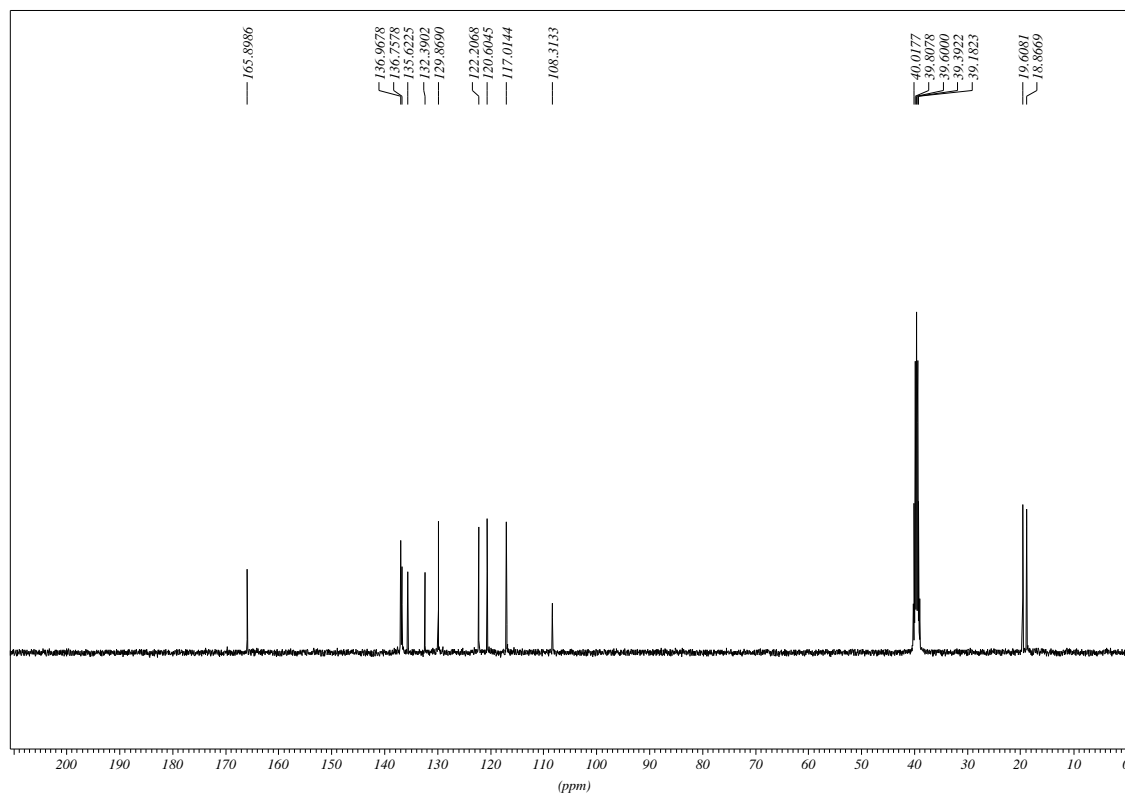

$^1\text{H-NMR}$  (400 MHz,  $\text{CDCl}_3$ , 298K) of the compound **2I**

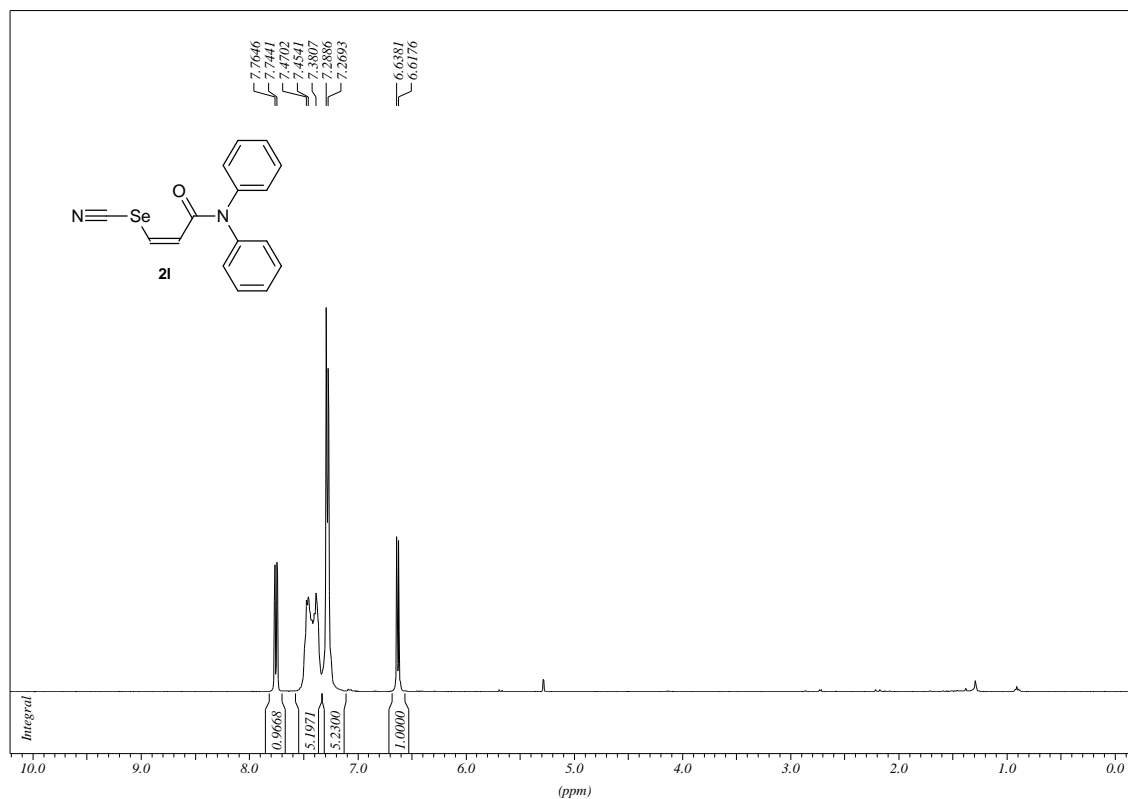

$^{13}\text{C-NMR}$  (100 MHz,  $\text{CDCl}_3$ , 298K) of the compound **2I**

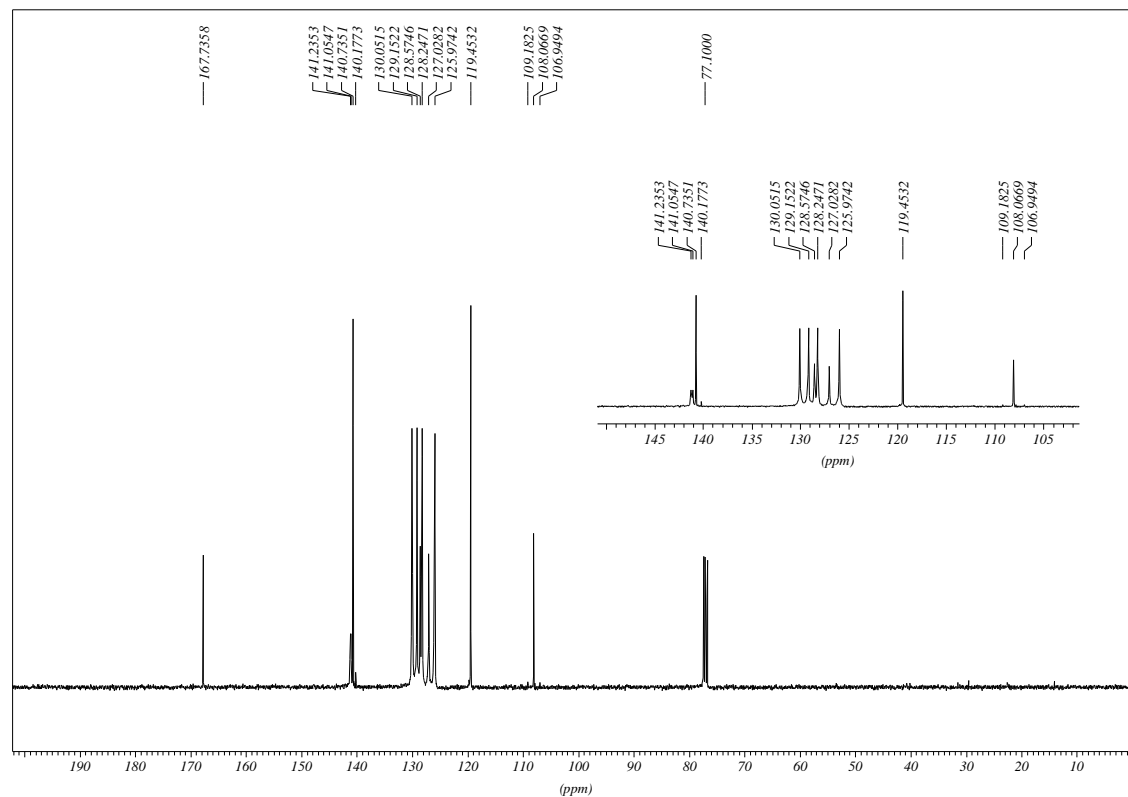

Supplement: s1 [file s1]
